# Supplementary material
Source: Springer Nature journal article supplement (https://www.springermedizin.de/resource/supplementary/12879_2012_2056_MOESM3_ESM.pdf/9443454)

No of IFN- $\gamma$  secreting cells/100 000 lymphocytes

300  
200  
100  
0  
-100

- OF-stimulation before Placebo
- OF-stimulation after Placebo
- ▲ OF-stimulation before Doxycycline
- ▼ OF-stimulation after Doxycycline

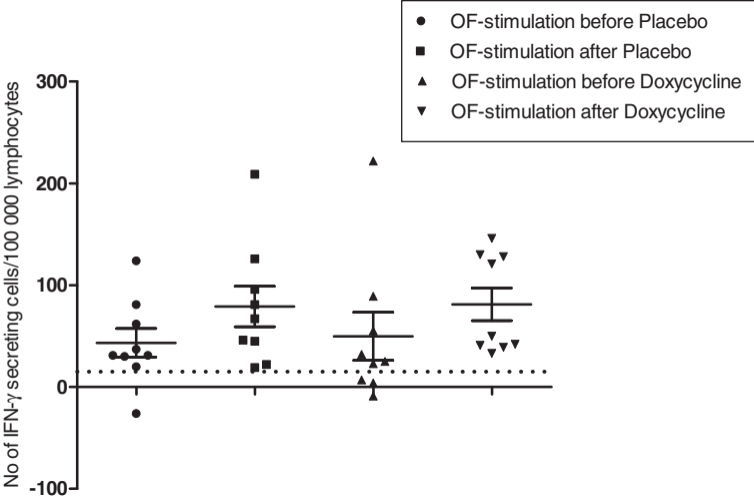

Supplement: MOESM3 [file 9443454]
